# Supplementary material for: Addressing inequity in palliative care provision for older people living with multimorbidity. Perspectives of community-dwelling older people on their palliative care needs: A scoping review
Source: PubMed Central journal article supplement (PMC10074761; doi:10.1177/02692163221118230), 2022-08-24
Supplement: sj-pdf-2-pmj-10.1177_02692163221118230.pdf [file sj-pdf-2-pmj-10.1177_02692163221118230.pdf]

Database(s): Ovid MEDLINE(R) Epub Ahead of Print, In-Process & Other Non-Indexed Citations, Ovid MEDLINE(R) Daily and Ovid MEDLINE(R) 1946 to Present Search Strategy:

| #  | Searches                                                                                                                                                                                                                                                                                                                                            | Results |
|----|-----------------------------------------------------------------------------------------------------------------------------------------------------------------------------------------------------------------------------------------------------------------------------------------------------------------------------------------------------|---------|
| 1  | (comorbid* or co-morbid* or multimorbid* or multi-morbid*).mp. [mp=title, abstract, original title, name of substance word, subject heading word, keyword heading word, protocol supplementary concept word, rare disease supplementary concept word, unique identifier, synonyms]                                                                  | 197654  |
| 2  | (multidisease* or multi-disease* or (multiple adj3 (illness* or disease* or condition* or syndrom* or disorder*))).mp. [mp=title, abstract, original title, name of substance word, subject heading word, keyword heading word, protocol supplementary concept word, rare disease supplementary concept word, unique identifier, synonyms]          | 41895   |
| 3  | exp Comorbidity/                                                                                                                                                                                                                                                                                                                                    | 91638   |
| 4  | 1 or 2 or 3                                                                                                                                                                                                                                                                                                                                         | 236961  |
| 5  | ((chronic* or long-term) adj3 (disease* or condition* or disorder* or ill*)).mp. [mp=title, abstract, original title, name of substance word, subject heading word, keyword heading word, protocol supplementary concept word, rare disease supplementary concept word, unique identifier, synonyms]                                                | 511713  |
| 6  | exp Chronic Disease/                                                                                                                                                                                                                                                                                                                                | 246536  |
| 7  | 5 or 6                                                                                                                                                                                                                                                                                                                                              | 511776  |
| 8  | (Non-malignan* or non-cancer* or non-oncolog*).mp. [mp=title, abstract, original title, name of substance word, subject heading word, keyword heading word, protocol supplementary concept word, rare disease supplementary concept word, unique identifier, synonyms]                                                                              | 16470   |
| 9  | 4 or 7 or 8                                                                                                                                                                                                                                                                                                                                         | 736905  |
| 10 | exp Diabetes Mellitus/ or diabet*.mp.                                                                                                                                                                                                                                                                                                               | 602303  |
| 11 | (hypertens* or high blood pressure).mp. [mp=title, abstract, original title, name of substance word, subject heading word, keyword heading word, protocol supplementary concept word, rare disease supplementary concept word, unique identifier, synonyms]                                                                                         | 464428  |
| 12 | exp Hypertension/                                                                                                                                                                                                                                                                                                                                   | 237496  |
| 13 | 11 or 12                                                                                                                                                                                                                                                                                                                                            | 464428  |
| 14 | ((heart* or cardiac or cardiovascular or coronary) adj3 (disease* or disorder* or failure* or insufficien* or arrhythmia*)).mp. [mp=title, abstract, original title, name of substance word, subject heading word, keyword heading word, protocol supplementary concept word, rare disease supplementary concept word, unique identifier, synonyms] | 816938  |
| 15 | exp Heart Diseases/                                                                                                                                                                                                                                                                                                                                 | 1028300 |
| 16 | 14 or 15                                                                                                                                                                                                                                                                                                                                            | 1327275 |
| 17 | ((kidney or renal) adj3 (disease* or disorder* or failure* or insufficien*)).mp. [mp=title, abstract, original title, name of substance word, subject heading word, keyword heading word, protocol supplementary concept word, rare disease supplementary concept word, unique identifier, synonyms]                                                | 319721  |
| 18 | exp Kidney Diseases/                                                                                                                                                                                                                                                                                                                                | 470411  |
| 19 | 17 or 18                                                                                                                                                                                                                                                                                                                                            | 546018  |
| 20 | ((liver or hepatic) adj3 (disease* or disorder* or failure* or insufficien*)).mp. [mp=title, abstract, original title, name of substance word, subject heading word, keyword heading word, protocol supplementary concept word, rare disease supplementary concept word, unique identifier, synonyms]                                               | 172638  |
| 21 | exp Liver Diseases/                                                                                                                                                                                                                                                                                                                                 | 503826  |
| 22 | 20 or 21                                                                                                                                                                                                                                                                                                                                            | 542246  |
| 23 | ((chronic* or obstruct*) adj3 (pulmonary or lung* or airway* or bronch* or respirator*)) or COPD).mp. [mp=title, abstract, original title, name of substance word, subject heading word, keyword heading word, protocol supplementary concept word, rare disease supplementary concept word, unique identifier, synonyms]                           | 142137  |
| 24 | exp Pulmonary Disease, Chronic Obstructive/                                                                                                                                                                                                                                                                                                         | 47457   |
| 25 | emphysema*.mp. or exp Pulmonary Emphysema/                                                                                                                                                                                                                                                                                                          | 33328   |
| 26 | asthma*.mp. or exp Asthma/                                                                                                                                                                                                                                                                                                                          | 162996  |
| 27 | 23 or 24 or 25 or 26                                                                                                                                                                                                                                                                                                                                | 306932  |
| 28 | (stroke or ((cerebrovascular or brain) adj3 (isch?emia* or h?emorrhage* or infarction*))).mp. [mp=title, abstract, original title, name of substance word, subject heading word, keyword heading word, protocol supplementary concept word, rare disease supplementary concept word, unique identifier, synonyms]                                   | 280626  |
| 29 | ((cerebrovascular or vascular or carotid* or arter*) adj3 (disease* or disorder*)).mp. [mp=title, abstract, original title, name of substance word, subject heading word, keyword heading word, protocol supplementary concept word, rare disease supplementary concept word, unique identifier, synonyms]                                          | 309102  |
| 30 | exp Cerebrovascular Disorders/                                                                                                                                                                                                                                                                                                                      | 327427  |
| 31 | 28 or 29 or 30                                                                                                                                                                                                                                                                                                                                      | 668270  |
| 32 | exp Arthritis, Rheumatoid/ or arthritis.mp.                                                                                                                                                                                                                                                                                                         | 211601  |
| 33 | exp Osteoporosis/ or osteoporosis.mp.                                                                                                                                                                                                                                                                                                               | 76769   |
| 34 | exp Musculoskeletal Diseases/ or musculoskeletal.mp.                                                                                                                                                                                                                                                                                                | 992313  |
| 35 | 32 or 33 or 34                                                                                                                                                                                                                                                                                                                                      | 1052644 |
| 36 | depression.mp. or exp Depression/                                                                                                                                                                                                                                                                                                                   | 347773  |
| 37 | (dementia or Alzheimer* or senil*).mp. [mp=title, abstract, original title, name of substance word, subject heading word, keyword heading word, protocol supplementary concept word, rare disease supplementary concept word, unique identifier, synonyms]                                                                                          | 210345  |
| 38 | exp Dementia/ or exp Alzheimer Disease/                                                                                                                                                                                                                                                                                                             | 144226  |
| 39 | 37 or 38                                                                                                                                                                                                                                                                                                                                            | 226417  |

|    |                                                                                                                                                                                                                                                                                                                                                                                     |         |
|----|-------------------------------------------------------------------------------------------------------------------------------------------------------------------------------------------------------------------------------------------------------------------------------------------------------------------------------------------------------------------------------------|---------|
| 40 | Parkinson*.mp. or exp Parkinson Disease/                                                                                                                                                                                                                                                                                                                                            | 110483  |
| 41 | (frail* or frailty syndrome).mp. [mp=title, abstract, original title, name of substance word, subject heading word, keyword heading word, protocol supplementary concept word, rare disease supplementary concept word, unique identifier, synonyms]                                                                                                                                | 19545   |
| 42 | 10 or 13 or 16 or 19 or 22 or 27 or 31 or 35 or 36 or 39 or 40 or 41                                                                                                                                                                                                                                                                                                                | 5128666 |
| 43 | ((co-occur* or cooccur* or co-exist* or coexist* or multipl*) adj3 (disease* or condition* or disorder* or ill* or symptom* or medication* or care*)).mp. [mp=title, abstract, original title, name of substance word, subject heading word, keyword heading word, protocol supplementary concept word, rare disease supplementary concept word, unique identifier, synonyms]       | 57139   |
| 44 | (chronic or long-term).mp. [mp=title, abstract, original title, name of substance word, subject heading word, keyword heading word, protocol supplementary concept word, rare disease supplementary concept word, unique identifier, synonyms]                                                                                                                                      | 1795626 |
| 45 | 43 or 44                                                                                                                                                                                                                                                                                                                                                                            | 1841331 |
| 46 | 42 and 45                                                                                                                                                                                                                                                                                                                                                                           | 811694  |
| 47 | (Old* person* or old* people or elder* or old* adult*).mp. [mp=title, abstract, original title, name of substance word, subject heading word, keyword heading word, protocol supplementary concept word, rare disease supplementary concept word, unique identifier, synonyms]                                                                                                      | 308705  |
| 48 | exp Aged/                                                                                                                                                                                                                                                                                                                                                                           | 2775459 |
| 49 | 47 or 48                                                                                                                                                                                                                                                                                                                                                                            | 2860899 |
| 50 | (Palliative care or support* care or terminal care or end-of-life or end of life or EOL or terminal* ill* or death or dying).mp. [mp=title, abstract, original title, name of substance word, subject heading word, keyword heading word, protocol supplementary concept word, rare disease supplementary concept word, unique identifier, synonyms]                                | 782868  |
| 51 | exp Palliative Care/                                                                                                                                                                                                                                                                                                                                                                | 47701   |
| 52 | exp Terminal Care/                                                                                                                                                                                                                                                                                                                                                                  | 46654   |
| 53 | 50 or 51 or 52                                                                                                                                                                                                                                                                                                                                                                      | 791036  |
| 54 | (Home-based or homebased).mp. [mp=title, abstract, original title, name of substance word, subject heading word, keyword heading word, protocol supplementary concept word, rare disease supplementary concept word, unique identifier, synonyms]                                                                                                                                   | 8025    |
| 55 | exp Home Care Services/                                                                                                                                                                                                                                                                                                                                                             | 44031   |
| 56 | 54 or 55                                                                                                                                                                                                                                                                                                                                                                            | 49781   |
| 57 | ((Primary adj3 care) or general practic* or generalist* or GP* or family practic* or family physician*).mp. [mp=title, abstract, original title, name of substance word, subject heading word, keyword heading word, protocol supplementary concept word, rare disease supplementary concept word, unique identifier, synonyms]                                                     | 388165  |
| 58 | ((Community adj3 service*) or community-based or community-dwell* or community nurs* or community health nurs* or community health vis* or district nurse*).mp. [mp=title, abstract, original title, name of substance word, subject heading word, keyword heading word, protocol supplementary concept word, rare disease supplementary concept word, unique identifier, synonyms] | 140308  |
| 59 | exp Community Health Services/                                                                                                                                                                                                                                                                                                                                                      | 276825  |
| 60 | 57 or 58 or 59                                                                                                                                                                                                                                                                                                                                                                      | 703871  |
| 61 | (Care home* or nursing home* or residential care home* or sheltered hous*).mp. [mp=title, abstract, original title, name of substance word, subject heading word, keyword heading word, protocol supplementary concept word, rare disease supplementary concept word, unique identifier, synonyms]                                                                                  | 44457   |
| 62 | exp Nursing Homes/                                                                                                                                                                                                                                                                                                                                                                  | 36058   |
| 63 | exp Homes for the Aged/                                                                                                                                                                                                                                                                                                                                                             | 12713   |
| 64 | exp Residential Facilities/                                                                                                                                                                                                                                                                                                                                                         | 48386   |
| 65 | 61 or 62 or 63 or 64                                                                                                                                                                                                                                                                                                                                                                | 59596   |
| 66 | exp Social Work/ or social work*.mp.                                                                                                                                                                                                                                                                                                                                                | 24704   |
| 67 | volunteer*.mp. or exp Volunteers/                                                                                                                                                                                                                                                                                                                                                   | 186581  |
| 68 | 56 or 60 or 65 or 66 or 67                                                                                                                                                                                                                                                                                                                                                          | 954537  |
| 69 | exp MULTIMORBIDITY/                                                                                                                                                                                                                                                                                                                                                                 | 51      |
| 70 | 9 or 69                                                                                                                                                                                                                                                                                                                                                                             | 736905  |
| 71 | 49 and 53 and 68 and 70                                                                                                                                                                                                                                                                                                                                                             | 2276    |
| 72 | 46 and 49 and 53 and 68                                                                                                                                                                                                                                                                                                                                                             | 1797    |
| 73 | 71 or 72                                                                                                                                                                                                                                                                                                                                                                            | 3026    |
| 74 | limit 73 to english language                                                                                                                                                                                                                                                                                                                                                        | 2832    |
| 75 | exp Needs Assessment/                                                                                                                                                                                                                                                                                                                                                               | 26847   |
| 76 | needs assessment.mp. [mp=title, abstract, original title, name of substance word, subject heading word, keyword heading word, protocol supplementary concept word, rare disease supplementary concept word, unique identifier, synonyms]                                                                                                                                            | 30080   |
| 77 | needs.mp. [mp=title, abstract, original title, name of substance word, subject heading word, keyword heading word, protocol supplementary concept word, rare disease supplementary concept word, unique identifier, synonyms]                                                                                                                                                       | 322067  |
| 78 | desire.mp. [mp=title, abstract, original title, name of substance word, subject heading word, keyword heading word, protocol supplementary concept word, rare disease supplementary concept word, unique identifier, synonyms]                                                                                                                                                      | 27890   |
| 79 | preferences.mp. [mp=title, abstract, original title, name of substance word, subject heading word, keyword heading word, protocol supplementary concept word, rare disease supplementary concept word, unique identifier, synonyms]                                                                                                                                                 | 62147   |

|    |                                                                                                                                                                                                                                              |        |
|----|----------------------------------------------------------------------------------------------------------------------------------------------------------------------------------------------------------------------------------------------|--------|
| 80 | wants.mp. [mp=title, abstract, original title, name of substance word, subject heading word, keyword heading word, protocol supplementary concept word, rare disease supplementary concept word, unique identifier, synonyms]                | 4045   |
| 81 | patient needs.mp. [mp=title, abstract, original title, name of substance word, subject heading word, keyword heading word, protocol supplementary concept word, rare disease supplementary concept word, unique identifier, synonyms]        | 2968   |
| 82 | exp "Health Services Needs and Demand"/                                                                                                                                                                                                      | 55602  |
| 83 | health services need.mp. [mp=title, abstract, original title, name of substance word, subject heading word, keyword heading word, protocol supplementary concept word, rare disease supplementary concept word, unique identifier, synonyms] | 165    |
| 84 | 75 or 76 or 77 or 78 or 79 or 80 or 81 or 82 or 83                                                                                                                                                                                           | 412254 |
| 85 | 74 and 84                                                                                                                                                                                                                                    | 413    |

**Result 1.** Unique Identifier

29471360

Authors Beach SR; Schulz R; Friedman EM; Rodakowski J; Martsolf G; James AE 3rd.  
 Authors Full Name Beach, Scott R; Schulz, Richard; Friedman, Esther M; Rodakowski, Juleen; Martsolf, Grant; James, Alton Everette 3rd.  
 Title Adverse Consequences of Unmet Needs for Care in High-Need/High-Cost Older Adults.  
 Source Journals of Gerontology Series B-Psychological Sciences & Social Sciences. 2018 Feb 17.  
 Publication Type Journal Article.

**Result 2.**

Unique Identifier 29336103  
 Authors Chan HY; Chun GK; Man CW; Leung EM.  
 Authors Full Name Chan, Helen YI; Chun, Gloria Km; Man, C W; Leung, Edward Mf.  
 Title Staff preparedness for providing palliative and end-of-life care in long-term care homes: Instrument development and validation.  
 Source Geriatrics & gerontology international. 2018 Jan 16.  
 Publication Type Journal Article.

**Result 3.**

Unique Identifier 29140508  
 Authors Sable-Smith A; Arnett KR; Nowels MA; Colborn K; Lum HD; Nowels D.  
 Authors Full Name Sable-Smith, Alex; Arnett, Kelly R; Nowels, Molly A; Colborn, Kathryn; Lum, Hillary D; Nowels, David.  
 Title Interactions with the healthcare system influence advance care planning activities: results from a representative survey in 11 developed countries.  
 Source Family Practice. 2017 Nov 13.  
 Publication Type Journal Article.

**Result 4.**

Unique Identifier 29206578  
 Authors Maldonado LY; Goodson RB; Mulroy MC; Johnson EM; Reilly JM; Homeier DC.  
 Authors Full Name Maldonado, Lauren Y; Goodson, Ruth B; Mulroy, Matthew C; Johnson, Emily M; Reilly, Jo M; Homeier, Diana C.  
 Title Wellness in Sickness and Health (The W.I.S.H. Project): Advance Care Planning Preferences and Experiences Among Elderly Latino Patients.  
 Source Clinical Gerontologist. 1-8, 2017 Oct 25.  
 Publication Type Journal Article.

**Result 5.**

Unique Identifier 29151044  
 Authors Lakkappa B; Shah S; Rogers S; Holman LH.  
 Authors Full Name Lakkappa, Bharath; Shah, Sanjay; Rogers, Stephen; Holman, Leanne Helen.  
 Title Mortality among referrals to a community-based intermediate care team.  
 Source BMJ supportive & palliative care. 2017 Nov 18.  
 Publication Type Journal Article.

**Result 6.**

Unique Identifier 27402261  
 Authors Afshar K; Geiger K; Muller-Mundt G; Bleidorn J; Schneider N.  
 Authors Full Name Afshar, K; Geiger, K; Muller-Mundt, G; Bleidorn, J; Schneider, N.  
 Title Generalist palliative care for non-cancer patients : A review article.  
 Source Der Schmerz. 2016 Jul 11.  
 Publication Type Journal Article.

**Result 7.**

Unique Identifier 26247082  
 Authors Pollock K; Wilson E.  
 Authors Full Name Pollock, Kristian; Wilson, Eleanor.  
 Book Title Care and communication between health professionals and patients affected by severe or chronic illness in community care settings: a qualitative study of care at the end of life  
 Source NIHR Journals Library. Health Services and Delivery Research 2015 07.  
 Publication Type Review.

**Result 8.**

Unique Identifier 25642566  
 Authors Hanratty B; Lowson E; Grande G; Payne S; Addington-Hall J; Valtorta N; Seymour J.  
 Authors Full Name Hanratty, Barbara; Lowson, Elizabeth; Grande, Gunn; Payne, Sheila; Addington-Hall, Julia; Valtorta, Nicole; Seymour, Jane.  
 Book Title Transitions at the end of life for older adults - patient, carer and professional perspectives: a mixed-methods study  
 Source NIHR Journals Library. Health Services and Delivery Research 2014 06.  
 Publication Type Review.

**Result 9.**

Unique Identifier 27606397  
 Authors Peterson K; Helfand M; Humphrey L; Christensen V; Carson S.  
 Authors Full Name Peterson, Kim; Helfand, Mark; Humphrey, Linda; Christensen, Vivian; Carson, Susan.  
 Title Evidence Brief: Effectiveness of Intensive Primary Care Programs. [Review]  
 Book Title VA Evidence-based Synthesis Program Evidence Briefs  
 Source Department of Veterans Affairs (US). VA Evidence-based Synthesis Program Reports 2011.  
 Publication Type Review.

**Result 10.**

Unique Identifier 28876730  
 Authors Swedish Council on Health Technology Assessment.  
 Authors Full Name Swedish Council on Health Technology Assessment.  
 Book Title Peripheral Arterial Disease - Diagnosis and Treatment: A Systematic Review  
 Source Swedish Council on Health Technology Assessment (SBU). SBU Systematic Review Summaries, SBU Yellow Report No. 187. 2008 11.  
 Publication Type Review.

**Result 11.**

Unique Identifier 27496356  
 Authors Chapman M; Johnston N; Lovell C; Forbat L; Liu WM.  
 Authors Full Name Chapman, Michael; Johnston, Nikki; Lovell, Clare; Forbat, Liz; Liu, Wai-Man.  
 Title Avoiding costly hospitalisation at end of life: findings from a specialist palliative care pilot in residential care for older adults.  
 Source BMJ supportive & palliative care. 8(1):102-109, 2018 Mar.  
 Publication Type Journal Article.

**Result 12.**

Unique Identifier 28960161  
 Authors Adogwa O; Elsamacicy AA; Vuong VD; Moreno J; Cheng J; Karikari IO; Bagley CA.  
 Authors Full Name Adogwa, Owoicho; Elsamacicy, Aladine A; Vuong, Victoria D; Moreno, Jessica; Cheng, Joseph; Karikari, Isaac O; Bagley, Carlos A.  
 Title Geriatric comanagement reduces perioperative complications and shortens duration of hospital stay after lumbar spine surgery: a prospective single-institution experience.  
 Source Journal of Neurosurgery Spine. 27(6):670-675, 2017 Dec.  
 Publication Type Journal Article.

---

**Result 13.**

Unique Identifier 29179710  
 Authors Payne S; Eastham R; Hughes S; Varey S; Hasselaar J; Preston N.  
 Authors Full Name Payne, Sheila; Eastham, Rachael; Hughes, Sean; Varey, Sandra; Hasselaar, Jeroen; Preston, Nancy.  
 Title Enhancing integrated palliative care: what models are appropriate? A cross-case analysis.  
 Source BMC Palliative Care. 16(1):64, 2017 Nov 28.  
 Publication Type Journal Article.

---

**Result 14.**

Unique Identifier 29169346  
 Authors Higginson IJ; Daveson BA; Morrison RS; Yi D; Meier D; Smith M; Ryan K; McQuillan R; Johnston BM; Normand C; BuildCARE.  
 Authors Full Name Higginson, Irene J; Daveson, Barbara A; Morrison, R Sean; Yi, Deokhee; Meier, Diane; Smith, Melinda; Ryan, Karen; McQuillan, Regina; Johnston, Bridget M; Normand, Charles; BuildCARE.  
 Title Social and clinical determinants of preferences and their achievement at the end of life: prospective cohort study of older adults receiving palliative care in three countries.  
 Source BMC Geriatrics. 17(1):271, 2017 Nov 23.  
 Publication Type Journal Article.

---

**Result 15.**

Unique Identifier 29061178  
 Authors Gonzalez K; Ulloa JG; Moreno G; Echeverria O; Norris K; Talamantes E.  
 Authors Full Name Gonzalez, Karla; Ulloa, Jesus G; Moreno, Gerardo; Echeverria, Oscar; Norris, Keith; Talamantes, Efrain.  
 Title Intensive procedure preferences at the end of life (EOL) in older Latino adults with end stage renal disease (ESRD) on dialysis.  
 Source BMC Nephrology. 18(1):319, 2017 Oct 23.  
 Publication Type Journal Article.

---

**Result 16.**

Unique Identifier 28933993  
 Authors Finucane AM; Stevenson B; Murray SA.  
 Authors Full Name Finucane, Anne M; Stevenson, Barbara; Murray, Scott A.  
 Title Gradual physical decline characterises the illness trajectories of care home residents.  
 Source International Journal of Palliative Nursing. 23(9):457-461, 2017 Sep 02.  
 Publication Type Journal Article.

---

**Result 17.**

Unique Identifier 28209982  
 Authors Chen YC; Weng SC; Liu JS; Chuang HL; Hsu CC; Tarng DC.  
 Authors Full Name Chen, Yi-Chi; Weng, Shuo-Chun; Liu, Jia-Sin; Chuang, Han-Lin; Hsu, Chih-Cheng; Tarng, Der-Cherng.  
 Title Severe Decline of Estimated Glomerular Filtration Rate Associates with Progressive Cognitive Deterioration in the Elderly: A Community-Based Cohort Study.  
 Source Scientific Reports. 7:42690, 2017 Feb 17.  
 Publication Type Journal Article.

---

**Result 18.**

Unique Identifier 24188214  
 Authors Abba K; Byrne P; Horton S; Lloyd-Williams M.  
 Authors Full Name Abba, Katharine; Byrne, Paula; Horton, Siobhan; Lloyd-Williams, Mari.  
 Title Interventions to encourage discussion of end-of-life preferences between members of the general population and the people closest to them - a systematic literature review.  
 Source BMC Palliative Care. 12(1):40, 2013 Nov 04.  
 Publication Type Journal Article.

---

**Result 19.**

Unique Identifier 24653231  
 Authors Pinnock H; Kendall M; Murray SA; Worth A; Levack P; Porter M; MacNee W; Sheikh A.  
 Authors Full Name Pinnock, Hilary; Kendall, Marilyn; Murray, Scott A; Worth, Allison; Levack, Pamela; Porter, Mike; MacNee, William; Sheikh, Aziz.  
 Title Living and dying with severe chronic obstructive pulmonary disease: multi-perspective longitudinal qualitative study. [Reprint of BMJ. 2011;342:d142; PMID: 21262897]  
 Source BMJ supportive & palliative care. 1(2):174-83, 2011 Sep.  
 Publication Type Journal Article.

---

**Result 20.**

Unique Identifier 21827696  
 Authors Duursma F; Schers HJ; Vissers KC; Hasselaar J.  
 Authors Full Name Duursma, Froukje; Schers, Henk J; Vissers, Kris Cp; Hasselaar, Jeroen.  
 Title Study protocol: optimization of complex palliative care at home via telemedicine. A cluster randomized controlled trial.  
 Source BMC Palliative Care. 10:13, 2011 Aug 09.  
 Publication Type Journal Article.

---

**Result 21.**

Unique Identifier 21388538  
 Authors Gysels M; Pell C; Straus L; Pool R.  
 Authors Full Name Gysels, Marjolein; Pell, Christopher; Straus, Lianne; Pool, Robert.  
 Title End of life care in sub-Saharan Africa: a systematic review of the qualitative literature.  
 Source BMC Palliative Care. 10:6, 2011 Mar 09.  
 Publication Type Journal Article.

---

**Result 22.**

Unique Identifier 23074509  
 Authors Health Quality Ontario.  
 Authors Full Name Health Quality Ontario.  
 Title Caregiver- and patient-directed interventions for dementia: an evidence-based analysis.  
 Source Ontario Health Technology Assessment Series. 8(4):1-98, 2008.  
 Publication Type Journal Article.

---

**Result 23.**

Unique Identifier 28056634  
 Authors van der Plas AG; Oosterveld-Vlug MG; Pasman HR; Onwuteaka-Philipsen BD.  
 Authors Full Name van der Plas, Annicka Gm; Oosterveld-Vlug, Mariska G; Pasman, H Roeline W; Onwuteaka-Philipsen, Bregje D.  
 Title Relating cause of death with place of care and healthcare costs in the last year of life for patients who died from cancer, chronic obstructive pulmonary disease, heart failure and dementia: A descriptive study using registry data.  
 Source Palliative Medicine. 31(4):338-345, 2017 Apr.  
 Publication Type Comparative Study. Journal Article.

---

**Result 24.**

Unique Identifier 27495813  
 Authors Lovell N; Jones C; Baynes D; Dinning S; Vinen K; Murtagh FE.  
 Authors Full Name Lovell, Natasha; Jones, Chris; Baynes, Dawn; Dinning, Sarah; Vinen, Katie; Murtagh, Fliss Em.  
 Title Understanding patterns and factors associated with place of death in patients with end-stage kidney disease: A retrospective cohort study. [Review]  
 Source Palliative Medicine. 31(3):283-288, 2017 Mar.  
 Publication Type Journal Article. Review.

---

**Result 25.**

Unique Identifier 27885156  
 Authors McNiel P; Westphal J.  
 Authors Full Name McNiel, Paula; Westphal, Judith.  
 Title Namaste Care™: A Person-Centered Care Approach for Alzheimer's and Advanced Dementia.  
 Source Western Journal of Nursing Research. 40(1):37-51, 2018 Jan.  
 Publication Type Journal Article.

---

**Result 26.**

Unique Identifier 28279992  
 Authors Browne J; Edwards DA; Rhodes KM; Brimicombe DJ; Payne RA.  
 Authors Full Name Browne, Jorge; Edwards, Duncan A; Rhodes, Kirsty M; Brimicombe, D James; Payne, Rupert A.  
 Title Association of comorbidity and health service usage among patients with dementia in the UK: a population-based study.  
 Source BMJ Open. 7(3):e012546, 2017 03 09.  
 Publication Type Journal Article. Multicenter Study.

---

**Result 27.**

Unique Identifier 26657464  
 Authors Nguyen M; Pachana NA; Beattie E; Fielding E; Ramis MA.  
 Authors Full Name Nguyen, Mynhi; Pachana, Nancy A; Beattie, Elizabeth; Fielding, Elaine; Ramis, Mary-Anne.  
 Title Effectiveness of interventions to improve family-staff relationships in the care of people with dementia in residential aged care: a systematic review protocol. [Review]  
 Source JBI Database Of Systematic Reviews And Implementation Reports. 13(11):52-63, 2015 Nov.  
 Publication Type Journal Article. Review.

---

**Result 28.**

Unique Identifier 27834616  
 Authors Inaba M.  
 Authors Full Name Inaba, Miyuki.  
 Title Aging and Elder Care in Japan: A Call for Empowerment-Oriented Community Development.  
 Source Journal of Gerontological Social Work. 59(7-8):587-603, 2016 Oct - Nov.  
 Publication Type Journal Article.

---

**Result 29.**

Unique Identifier 27645556  
 Authors Amblas-Novellas J; Murray SA; Espauella J; Martori JC; Oller R; Martinez-Munoz M; Molist N; Blay C; Gomez-Batiste X.  
 Authors Full Name Amblas-Novellas, J; Murray, S A; Espauella, J; Martori, J C; Oller, R; Martinez-Munoz, M; Molist, N; Blay, C; Gomez-Batiste, X.  
 Title Identifying patients with advanced chronic conditions for a progressive palliative care approach: a cross-sectional study of prognostic indicators related to end-of-life trajectories.  
 Source BMJ Open. 6(9):e012340, 2016 09 19.  
 Publication Type Journal Article. Research Support, Non-U.S. Gov't.

---

**Result 30.**

Unique Identifier 27064659  
 Authors Morisset J; Dube BP; Garvey C; Bourbeau J; Collard HR; Swigris JJ; Lee JS.  
 Authors Full Name Morisset, Julie; Dube, Bruno-Pierre; Garvey, Chris; Bourbeau, Jean; Collard, Harold R; Swigris, Jeffrey J; Lee, Joyce S.  
 Title The Unmet Educational Needs of Patients with Interstitial Lung Disease. Setting the Stage for Tailored Pulmonary Rehabilitation.  
 Source Annals of the American Thoracic Society. 13(7):1026-33, 2016 Jul.  
 Publication Type Journal Article. Multicenter Study.

---

**Result 31.**

Unique Identifier 28991827  
 Authors Ehlenbach WJ; Gilmore-Bykovskiy A; Repplinger MD; Westergaard RP; Jacobs EA; Kind AJH; Smith M.  
 Authors Full Name Ehlenbach, William J; Gilmore-Bykovskiy, Andrea; Repplinger, Michael D; Westergaard, Ryan P; Jacobs, Elizabeth A; Kind, Amy J H; Smith, Maureen.  
 Title Sepsis Survivors Admitted to Skilled Nursing Facilities: Cognitive Impairment, Activities of Daily Living Dependence, and Survival.  
 Source Critical Care Medicine. 46(1):37-44, 2018 Jan.  
 Publication Type Comparative Study. Journal Article.

---

**Result 32.**

Unique Identifier 28145084  
 Authors Valery PC; Clark PJ; McPhail SM; Rahman T; Hayward K; Martin J; Horsfall L; Volk ML; Skoien R; Powell E.  
 Authors Full Name Valery, Patricia C; Clark, Paul J; McPhail, Steven M; Rahman, Tony; Hayward, Kelly; Martin, Jennifer; Horsfall, Leigh; Volk, Michael L; Skoien, Richard; Powell, Elizabeth.  
 Title Exploratory study into the unmet supportive needs of people diagnosed with cirrhosis in Queensland, Australia.  
 Source Internal Medicine Journal. 47(4):429-435, 2017 Apr.  
 Publication Type Journal Article.

---

**Result 33.**

Unique Identifier 29229128  
 Authors Fernandes-Taylor S; Berg S; Gunter R; Bennett K; Smith MA; Rathouz PJ; Greenberg CC; Kent KC.  
 Authors Full Name Fernandes-Taylor, Sara; Berg, Stephen; Gunter, Rebecca; Bennett, Kyla; Smith, Maureen A; Rathouz, Paul J; Greenberg, Caprice C; Kent, K Craig.  
 Title Thirty-day readmission and mortality among Medicare beneficiaries discharged to skilled nursing facilities after vascular surgery.  
 Source Journal of Surgical Research. 221:196-203, 2018 Jan.  
 Publication Type Journal Article.

---

**Result 34.**

Unique Identifier 28495366  
 Authors Slomka J; Prince-Paul M; Webel A; Daly BJ.  
 Authors Full Name Slomka, Jacquelyn; Prince-Paul, Maryjo; Webel, Allison; Daly, Barbara J.  
 Title Multimorbidity With HIV: Views of Community-Based People Living With HIV and Other Chronic Conditions.  
 Source Journal of the Association of Nurses in AIDS Care. 28(4):603-611, 2017 Jul - Aug.  
 Publication Type Journal Article.

---

**Result 35.**

Unique Identifier 28991827  
 Authors Ehlenbach WJ; Gilmore-Bykovskiy A; Repplinger MD; Westergaard RP; Jacobs EA; Kind AJH; Smith M.  
 Authors Full Name Ehlenbach, William J; Gilmore-Bykovskiy, Andrea; Repplinger, Michael D; Westergaard, Ryan P; Jacobs, Elizabeth A; Kind, Amy J H; Smith, Maureen.  
 Title Sepsis Survivors Admitted to Skilled Nursing Facilities: Cognitive Impairment, Activities of Daily Living Dependence, and Survival.  
 Source Critical Care Medicine. 46(1):37-44, 2018 Jan.  
 Publication Type Comparative Study. Journal Article.

**Result 36.**

Unique Identifier 26808530

Authors Chochinov HM; Johnston W; McClement SE; Hack TF; Dufault B; Enns M; Thompson G; Harlos M; Damant RW; Ramsey CD; Davison S; Zacharias J; Milke D; Strang D; Campbell-Enns HJ; Kredentser MS.

Authors Full Name Chochinov, Harvey Max; Johnston, Wendy; McClement, Susan E; Hack, Thomas F; Dufault, Brenden; Enns, Murray; Thompson, Genevieve; Harlos, Mike; Damant, Ronald W; Ramsey, Clare D; Davison, Sara; Zacharias, James; Milke, Doris; Strang, David; Campbell-Enns, Heather J; Kredentser, Maia S.

Title Dignity and Distress towards the End of Life across Four Non-Cancer Populations.[Erratum appears in PLoS One. 2017 Nov 9;12 (11):e0188141; PMID: 29121648]

Source PLoS ONE [Electronic Resource]. 11(1):e0147607, 2016.

Publication Type Journal Article. Multicenter Study. Research Support, Non-U.S. Gov't.

**Result 37.**

Unique Identifier 28295138

Authors Russell D; Diamond EL; Lauder B; Dignam RR; Dowding DW; Peng TR; Prigerson HG; Bowles KH.

Authors Full Name Russell, David; Diamond, Eli L; Lauder, Bonnie; Dignam, Ritchell R; Dowding, Dawn W; Peng, Timothy R; Prigerson, Holly G; Bowles, Kathryn H.

Title Frequency and Risk Factors for Live Discharge from Hospice.

Source Journal of the American Geriatrics Society. 65(8):1726-1732, 2017 Aug.

Publication Type Journal Article.

**Result 38.**

Unique Identifier 27932338

Authors Marx G; Nasse M; Stanze H; Boakye SO; Nauck F; Schneider N.

Authors Full Name Marx, Gabriella; Nasse, Maximilian; Stanze, Henrikje; Boakye, Sonja Owusu; Nauck, Friedemann; Schneider, Nils.

Title Meaning of living with severe chronic obstructive lung disease: a qualitative study.

Source BMJ Open. 6(12):e011555, 2016 12 08.

Publication Type Journal Article. Research Support, Non-U.S. Gov't.

**Result 39.**

Unique Identifier 19417860

Authors Campbell NR; Leiter LA; Larochelle P; Tobe S; Chockalingam A; Ward R; Morris D; Tsuyuki R.

Authors Full Name Campbell, Norman R C; Leiter, Lawrence A; Larochelle, Pierre; Tobe, Sheldon; Chockalingam, Arun; Ward, Richard; Morris, Dorothy; Tsuyuki, Ross.

Title Hypertension in diabetes: a call to action. [Review] [48 refs]

Source Canadian Journal of Cardiology. 25(5):299-302, 2009 May.

Publication Type Journal Article. Review.

**Result 40.**

Unique Identifier 17932591

Authors Champagne J; Philippon F; Gilbert M; Molin F; Blier L; Nault I; Sarrazin JF; Charbonneau L; Dufort L; Drolet B; Chahine M; O'Hara GE.

Authors Full Name Champagne, Jean; Philippon, Francois; Gilbert, Marcel; Molin, Franck; Blier, Louis; Nault, Isabelle; Sarrazin, Jean-Francois; Charbonneau, Lyne; Dufort, Line; Drolet, Benoit; Chahine, Mohamed; O'Hara, Gilles E.

Title The Brugada syndrome in Canada: a unique French-Canadian experience.[Erratum appears in Can J Cardiol. 2009 Mar;25(3):140]

Source Canadian Journal of Cardiology. 23 Suppl B:71B-75B, 2007 Oct.

Publication Type Journal Article. Research Support, Non-U.S. Gov't.

**Result 41.**

Unique Identifier 28892128

Authors Emerson JA; Smith CY; Long KH; Ransom JE; Roberts RO; Hass SL; Duhig AM; Petersen RC; Leibson CL.

Authors Full Name Emerson, Jane A; Smith, Carin Y; Long, Kirsten H; Ransom, Jeanine E; Roberts, Rosebud O; Hass, Steven L; Duhig, Amy M; Petersen, Ronald C; Leibson, Cynthia L.

Title Nursing Home Use Across The Spectrum of Cognitive Decline: Merging Mayo Clinic Study of Aging With CMS MDS Assessments.

Source Journal of the American Geriatrics Society. 65(10):2235-2243, 2017 Oct.

Publication Type Journal Article.

**Result 42.**

Unique Identifier 28707495

Authors Carlin BW; Schuldheisz SK; Noth I; Criner GJ.

Authors Full Name Carlin, Brian W; Schuldheisz, Sandra K; Noth, Imre; Criner, Gerard J.

Title Individualizing the selection of long-acting bronchodilator therapy for patients with COPD: considerations in primary care.

Source Postgraduate Medicine. 129(7):725-733, 2017 Sep.

Publication Type Journal Article.

**Result 43.**

Unique Identifier 28542120

Authors Taylor CA; Greenlund SF; McGuire LC; Lu H; Croft JB.

Authors Full Name Taylor, Christopher A; Greenlund, Sujay F; McGuire, Lisa C; Lu, Hua; Croft, Janet B.

Title Deaths from Alzheimer's Disease - United States, 1999-2014.

Source MMWR - Morbidity & Mortality Weekly Report. 66(20):521-526, 2017 May 26.

Publication Type Journal Article.

**Result 44.**

Unique Identifier 28424546

Authors Mignani V; Ingravallo F; Mariani E; Chattat R.

Authors Full Name Mignani, Veronica; Ingravallo, Francesca; Mariani, Elena; Chattat, Rabih.

Title Perspectives of older people living in long-term care facilities and of their family members toward advance care planning discussions: a systematic review and thematic synthesis. [Review]

Source Clinical Interventions In Aging. 12:475-484, 2017.

Publication Type Journal Article. Review.

**Result 45.**

Unique Identifier 28392683

Authors Mulpuru S; McKay J; Ronksley PE; Thavorn K; Kobewka DM; Forster AJ.

Authors Full Name Mulpuru, Sunita; McKay, Jennifer; Ronksley, Paul E; Thavorn, Kednapa; Kobewka, Daniel M; Forster, Alan J.

Title Factors contributing to high-cost hospital care for patients with COPD.

Source International Journal of Copd. 12:989-995, 2017.

Publication Type Journal Article. Observational Study.

**Result 46.**

Unique Identifier 28292824

Authors Yim CK; Barron Y; Moore S; Murtaugh C; Lala A; Aldridge M; Goldstein N; Gelfman LP.

Authors Full Name Yim, Cindi K; Barron, Yolanda; Moore, Stanley; Murtaugh, Chris; Lala, Anuradha; Aldridge, Melissa; Goldstein, Nathan; Gelfman, Laura P.

Title Hospice Enrollment in Patients With Advanced Heart Failure Decreases Acute Medical Service Utilization.

Source Circulation: Heart Failure. 10(3), 2017 Mar.

Publication Type Journal Article. Observational Study.

**Result 47.**

Unique Identifier 28263377

Authors Pollack LR; Goldstein NE; Gonzalez WC; Blinderman CD; Maurer MS; Lederer DJ; Baldwin MR.

Authors Full Name Pollack, Lauren R; Goldstein, Nathan E; Gonzalez, Wendy C; Blinderman, Craig D; Maurer, Mathew S; Lederer, David J; Baldwin, Matthew R.

Title The Frailty Phenotype and Palliative Care Needs of Older Survivors of Critical Illness.  
 Source Journal of the American Geriatrics Society. 65(6):1168-1175, 2017 Jun.  
 Publication Type Journal Article.

---

**Result 48.**

Unique Identifier 28244346  
 Authors Mulqueen K; Coffey A.  
 Authors Full Name Mulqueen, Kiri; Coffey, Alice.  
 Title Preferences of residents with dementia for end of life care.  
 Source Nursing Older People. 29(2):26-30, 2017 Feb 28.  
 Publication Type Comparative Study. Journal Article.

---

**Result 49.**

Unique Identifier 28209392  
 Authors McQuown CM; Frey JA; Amireh A; Chaudhary A.  
 Authors Full Name McQuown, Colleen M; Frey, Jennifer A; Amireh, Ahmad; Chaudhary, Ali.  
 Title Transfer of DNR orders to the ED from extended care facilities.  
 Source American Journal of Emergency Medicine. 35(7):983-985, 2017 Jul.  
 Publication Type Journal Article.

---

**Result 50.**

Unique Identifier 28143412  
 Authors Ploeg J; Matthew-Maich N; Fraser K; Dufour S; McAiney C; Kaasalainen S; Markle-Reid M; Upshur R; Cleghorn L; Emili A.  
 Authors Full Name Ploeg, Jenny; Matthew-Maich, Nancy; Fraser, Kimberly; Dufour, Sinead; McAiney, Carrie; Kaasalainen, Sharon; Markle-Reid, Maureen; Upshur, Ross; Cleghorn, Laura; Emili, Anna.  
 Title Managing multiple chronic conditions in the community: a Canadian qualitative study of the experiences of older adults, family caregivers and healthcare providers.  
 Source BMC Geriatrics. 17(1):40, 2017 Jan 31.  
 Publication Type Journal Article.

---

**Result 51.**

Unique Identifier 26656032  
 Authors Pouliot K; Weisse CS; Pratt DS; DiSorbo P.  
 Authors Full Name Pouliot, Katherine; Weisse, Carol S; Pratt, David S; DiSorbo, Philip.  
 Title First-Year Analysis of a New, Home-Based Palliative Care Program Offered Jointly by a Community Hospital and Local Visiting Nurse Service.  
 Source American Journal of Hospice & Palliative Medicine. 34(2):166-172, 2017 Mar.  
 Publication Type Journal Article.

---

**Result 52.**

Unique Identifier 26494830  
 Authors Manu ER; Mody L; McNamara SE; Vitale CA.  
 Authors Full Name Manu, Erika R; Mody, Lona; McNamara, Sara E; Vitale, Caroline A.  
 Title Advance Directives and Care Received by Older Nursing Home Residents.  
 Source American Journal of Hospice & Palliative Medicine. 34(2):105-110, 2017 Mar.  
 Publication Type Journal Article.

---

**Result 53.**

Unique Identifier 25168076  
 Authors Elliott M; Nicholson C.  
 Authors Full Name Elliott, Margaret; Nicholson, Caroline.  
 Title A qualitative study exploring use of the surprise question in the care of older people: perceptions of general practitioners and challenges for practice.

Source BMJ supportive & palliative care. 7(1):32-38, 2017 Mar.  
 Publication Type Journal Article.

**Result 54.**

Unique Identifier 27883315  
 Authors Stryckers M; Nagler EV; Van Biesen W.  
 Authors Full Name Stryckers, Marijke; Nagler, Evi V; Van Biesen, Wim.  
 Title The Need for Accurate Risk Prediction Models for Road Mapping, Shared Decision Making and Care Planning for the Elderly with Advanced Chronic Kidney Disease.  
 Source Prilozi Makedonska Akademija Na Naukite I Umetnostite Oddelenie Za Medicinski Nauki. 37(2-3):33-42, 2016 Nov 01.  
 Publication Type Journal Article.

**Result 55.**

Unique Identifier 27822976  
 Authors Winthereik A; Neergaard M; Vedsted P; Jensen A.  
 Authors Full Name Winthereik, Anna; Neergaard, Mette; Vedsted, Peter; Jensen, Anders.  
 Title Danish general practitioners' self-reported competences in end-of-life care.  
 Source Scandinavian Journal of Primary Health Care. 34(4):420-427, 2016 Dec.  
 Publication Type Journal Article.

**Result 56.**

Unique Identifier 27381487  
 Authors Fisher RF; Lasserson D; Hayward G.  
 Authors Full Name Fisher, Rebecca Fr; Lasserson, Daniel; Hayward, Gail.  
 Title Out-of-hours primary care use at the end of life: a descriptive study.  
 Source British Journal of General Practice. 66(650):e654-60, 2016 Sep.  
 Publication Type Journal Article.

**Result 57.**

Unique Identifier 27257779  
 Authors Casarett D; Teno J.  
 Authors Full Name Casarett, David; Teno, Joan.  
 Title Why Population Health and Palliative Care Need Each Other.  
 Source JAMA. 316(1):27-8, 2016 Jul 05.  
 Publication Type Journal Article.

**Result 58.**

Unique Identifier 27251335  
 Authors Marcucci FC; Cabrera MA; Perilla AB; Brun MM; de Barros EM; Martins VM; Rosenberg JP; Yates P.  
 Authors Full Name Marcucci, Fernando C I; Cabrera, Marcos A S; Perilla, Anamaria Baquero; Brun, Marilia Maroneze; de Barros, Eder Marcos L; Martins, Vanessa M; Rosenberg, John P; Yates, Patsy.  
 Title Identification and characteristics of patients with palliative care needs in Brazilian primary care.  
 Source BMC Palliative Care. 15:51, 2016 Jun 01.  
 Publication Type Journal Article.

**Result 59.**

Unique Identifier 27215058  
 Authors Wasyluk BA; Davison SN.  
 Authors Full Name Wasyluk, Betty Ann; Davison, Sara N.  
 Title An overview of advance care planning for patients with advanced chronic kidney disease: The basics.

Source Cannt Journal. 26(1):24-9, 2016 Jan-Mar.  
 Publication Type Journal Article.

**Result 60.**

Unique Identifier 27139373  
 Authors Bailey C; Hewison A; Karasouli E; Staniszewska S; Munday D.  
 Authors Full Name Bailey, Cara; Hewison, Alistair; Karasouli, Eleni; Staniszewska, Sophie; Munday, Daniel.  
 Title Hospital care following emergency admission: a critical incident case study of the experiences of patients with advanced lung cancer and Chronic Obstructive Pulmonary Disease.  
 Source Journal of Clinical Nursing. 25(15-16):2168-79, 2016 Aug.  
 Publication Type Journal Article.

**Result 61.**

Unique Identifier 27113154  
 Authors Pak E; Wald J; Kirkpatrick JN.  
 Authors Full Name Pak, Esther; Wald, Joyce; Kirkpatrick, James N.  
 Title Multimorbidity and End of Life Care in Patients with Cardiovascular Disease. [Review]  
 Source Clinics in Geriatric Medicine. 32(2):385-97, 2016 May.  
 Publication Type Journal Article. Review.

**Result 62.**

Unique Identifier 27079676  
 Authors Hopp FP; Zalenski RJ; Waselewsky D; Burn J; Camp J; Welch RD; Levy P.  
 Authors Full Name Hopp, Faith P; Zalenski, Robert J; Waselewsky, Denise; Burn, Jeri; Camp, Jessica; Welch, Robert D; Levy, Phillip.  
 Title Results of a Hospital-Based Palliative Care Intervention for Patients With an Acute Exacerbation of Chronic Heart Failure.  
 Source Journal of Cardiac Failure. 22(12):1033-1036, 2016 Dec.  
 Publication Type Journal Article. Randomized Controlled Trial.

**Result 63.**

Unique Identifier 27079335  
 Authors Rich MW; Chyun DA; Skolnick AH; Alexander KP; Forman DE; Kitzman DW; Maurer MS; McClurken JB; Resnick BM; Shen WK; Tirschwell DL; American Heart Association Older Populations Committee of the Council on Clinical Cardiology, Council on Cardiovascular and Stroke Nursing, Council on Cardiovascular Surgery and Anesthesia, and Stroke Council; American College of Cardiology; and American Geriatrics Society.  
 Authors Full Name Rich, Michael W; Chyun, Deborah A; Skolnick, Adam H; Alexander, Karen P; Forman, Daniel E; Kitzman, Dalane W; Maurer, Mathew S; McClurken, James B; Resnick, Barbara M; Shen, Win K; Tirschwell, David L; American Heart Association Older Populations Committee of the Council on Clinical Cardiology, Council on Cardiovascular and Stroke Nursing, Council on Cardiovascular Surgery and Anesthesia, and Stroke Council; American College of Cardiology; and American Geriatrics Society.  
 Title Knowledge Gaps in Cardiovascular Care of the Older Adult Population: A Scientific Statement From the American Heart Association, American College of Cardiology, and American Geriatrics Society.  
 Source Journal of the American College of Cardiology. 67(20):2419-2440, 2016 May 24.  
 Publication Type Journal Article.

**Result 64.**

Unique Identifier 27053406  
 Authors Slomka J; Prince-Paul M; Webel A; Daly BJ.  
 Authors Full Name Slomka, Jacquelyn; Prince-Paul, Maryjo; Webel, Allison; Daly, Barbara J.  
 Title Palliative Care, Hospice, and Advance Care Planning: Views of People Living with HIV and Other Chronic Conditions.  
 Source Journal of the Association of Nurses in AIDS Care. 27(4):476-84, 2016 Jul-Aug.  
 Publication Type Journal Article. Research Support, N.I.H., Extramural.

**Result 65.**

Unique Identifier 27051994

Authors Reymond L; Cooper K; Parker D; Chapman M.  
 Authors Full Name Reymond, Liz; Cooper, Karen; Parker, Deborah; Chapman, Michael.  
 Title End-of-life care: Proactive clinical management of older Australians in the community.  
 Source Australian Family Physician. 45(1):76-8, 2016 Jan-Feb.  
 Publication Type Journal Article.

---

**Result 66.**

Unique Identifier 26825873  
 Authors Chao CT; Tsai HB; Shih CY; Hsu SH; Hung YC; Lai CF; Ueng RH; Chan DC; Hwang JJ; Huang SJ.  
 Authors Full Name Chao, Chia-Ter; Tsai, Hung-Bin; Shih, Chih-Yuan; Hsu, Su-Hsuan; Hung, Yu-Chien; Lai, Chun-Fu; Ueng, Ruey-Hsiuang; Chan, Ding-Cheng; Hwang, Juey-Jen; Huang, Sheng-Jean.  
 Title Establishment of a renal supportive care program: Experience from a rural community hospital in Taiwan. [Review]  
 Source Journal of the Formosan Medical Association. 115(7):490-500, 2016 Jul.  
 Publication Type Journal Article. Review.

---

**Result 67.**

Unique Identifier 26603186  
 Authors Sahlen KG; Boman K; Brannstrom M.  
 Authors Full Name Sahlen, Klas-Goran; Boman, Kurt; Brannstrom, Margareta.  
 Title A cost-effectiveness study of person-centered integrated heart failure and palliative home care: Based on a randomized controlled trial.  
 Source Palliative Medicine. 30(3):296-302, 2016 Mar.  
 Publication Type Journal Article. Randomized Controlled Trial. Research Support, Non-U.S. Gov't.

---

**Result 68.**

Unique Identifier 26373835  
 Authors Aggarwal SK; Ghosh A; Cheng MJ; Luton K; Lowet PF; Berger A.  
 Authors Full Name Aggarwal, Sunil K; Ghosh, Amrita; Cheng, M Jennifer; Luton, Kathleen; Lowet, Peter F; Berger, Ann.  
 Title Initiating pain and palliative care outpatient services for the suburban underserved in Montgomery County, Maryland: Lessons learned at the NIH Clinical Center and MobileMed.  
 Source Palliative & Supportive Care. 14(4):381-6, 2016 08.  
 Publication Type Journal Article.

---

**Result 69.**

Unique Identifier 26261374  
 Authors Kwok AO; Yuen SK; Yong DS; Tse DM.  
 Authors Full Name Kwok, Annie O; Yuen, Sze-Kit; Yong, David S; Tse, Doris M.  
 Title The Symptoms Prevalence, Medical Interventions, and Health Care Service Needs for Patients With End-Stage Renal Disease in a Renal Palliative Care Program.  
 Source American Journal of Hospice & Palliative Medicine. 33(10):952-958, 2016 Dec.  
 Publication Type Journal Article.

---

**Result 70.**

Unique Identifier 25818406  
 Authors Watson E; Shinkins B; Frith E; Neal D; Hamdy F; Walter F; Weller D; Wilkinson C; Faithfull S; Wolstenholme J; Sooriakumaran P; Kastner C; Campbell C; Neal R; Butcher H; Matthews M; Perera R; Rose P.  
 Authors Full Name Watson, Eila; Shinkins, Bethany; Frith, Emma; Neal, David; Hamdy, Freddie; Walter, Fiona; Weller, David; Wilkinson, Clare; Faithfull, Sara; Wolstenholme, Jane; Sooriakumaran, Prasanna; Kastner, Christof; Campbell, Christine; Neal, Richard; Butcher, Hugh; Matthews, Mike; Perera, Rafael; Rose, Peter.  
 Title Symptoms, unmet needs, psychological well-being and health status in survivors of prostate cancer: implications for redesigning follow-up.  
 Source BJU International. 117(6B):E10-9, 2016 Jun.  
 Publication Type Journal Article.

---

**Result 71.**

Unique Identifier 25743437  
 Authors Magee C; Koffman J.  
 Authors Full Name Magee, Claire; Koffman, Jonathan.  
 Title Out-of-hours palliative care: what are the educational needs and preferences of general practitioners?.  
 Source BMJ supportive & palliative care. 6(3):362-8, 2016 Sep.  
 Publication Type Journal Article.

---

**Result 72.**

Unique Identifier 25023218  
 Authors Mason B; Nanton V; Epiphaniou E; Murray SA; Donaldson A; Shipman C; Daveson BA; Harding R; Higginson IJ; Munday D; Barclay S; Dale J; Kendall M; Worth A; Boyd K.  
 Authors Full Name Mason, Bruce; Nanton, Veronica; Epiphaniou, Eleni; Murray, Scott A; Donaldson, Anne; Shipman, Cathy; Daveson, Barbara A; Harding, Richard; Higginson, Irene J; Munday, Dan; Barclay, Stephen; Dale, Jeremy; Kendall, Marilyn; Worth, Allison; Boyd, Kirsty.  
 Title 'My body's falling apart.' Understanding the experiences of patients with advanced multimorbidity to improve care: serial interviews with patients and carers.  
 Source BMJ supportive & palliative care. 6(1):60-5, 2016 Mar.  
 Publication Type Journal Article. Multicenter Study. Research Support, Non-U.S. Gov't.

---

**Result 73.**

Unique Identifier 22663083  
 Authors Kim Y; Yen IH; Rabow MW.  
 Authors Full Name Kim, Yunie; Yen, Irene H; Rabow, Michael W.  
 Title Comparing Symptom Burden in Patients with Metastatic and Nonmetastatic Cancer.  
 Source Journal of Palliative Medicine. 19(1):64-8, 2016 Jan.  
 Publication Type Comparative Study. Journal Article.

---

**Result 74.**

Unique Identifier 26897863  
 Authors Thavarajah N; Menjak I; Trudeau M; Mehta R; Wright F; Leahey A; Ellis J; Gallagher D; Moore J; Bristow B; Kay N; Szumacher E.  
 Authors Full Name Thavarajah, Nemica; Menjak, Ines; Trudeau, Maureen; Mehta, Rajin; Wright, Frances; Leahey, Angela; Ellis, Janet; Gallagher, Damian; Moore, Jennifer; Bristow, Bonnie; Kay, Noreen; Szumacher, Ewa.  
 Title Towards an optimal multidisciplinary approach to breast cancer treatment for older women. [Review]  
 Source Canadian Oncology Nursing Journal. 25(4):384-408, 2015.  
 Publication Type Journal Article. Review.

---

**Result 75.**

Unique Identifier 26496646  
 Authors Morgan DG; Kosteniuk JG; Stewart NJ; O'Connell ME; Kirk A; Crossley M; Dal Bello-Haas V; Forbes D; Innes A.  
 Authors Full Name Morgan, Debra G; Kosteniuk, Julie G; Stewart, Norma J; O'Connell, Megan E; Kirk, Andrew; Crossley, Margaret; Dal BelloHaas, Vanina; Forbes, Dorothy; Innes, Anthea.  
 Title Availability and Primary Health Care Orientation of Dementia-Related Services in Rural Saskatchewan, Canada.  
 Source Home Health Care Services Quarterly. 34(3-4):137-58, 2015.  
 Publication Type Journal Article. Research Support, Non-U.S. Gov't.

---

**Result 76.**

Unique Identifier 26480973  
 Authors Shaulov A; Frankel M; Rubinow A; Maaravi Y; Brezis M.  
 Authors Full Name Shaulov, Adir; Frankel, Meir; Rubinow, Alan; Maaravi, Yoram; Brezis, Mayer.  
 Title Preparedness for End of Life-a Survey of Jerusalem District Nursing Homes.  
 Source Journal of the American Geriatrics Society. 63(10):2114-9, 2015 Oct.  
 Publication Type Journal Article.

**Result 77.**

Unique Identifier 26429705  
 Authors Hedinger D; Hammig O; Bopp M; Swiss National Cohort Study Group.  
 Authors Full Name Hedinger, Damian; Hammig, Oliver; Bopp, Matthias; Swiss National Cohort Study Group.  
 Title Social determinants of duration of last nursing home stay at the end of life in Switzerland: a retrospective cohort study.  
 Source BMC Geriatrics. 15:114, 2015 Oct 01.  
 Publication Type Journal Article. Research Support, Non-U.S. Gov't.

**Result 78.**

Unique Identifier 26398744  
 Authors Burge F; Lawson B; Johnston G; Asada Y; McIntyre PF; Flowerdew G.  
 Authors Full Name Burge, Fred; Lawson, Beverley; Johnston, Grace; Asada, Yukiko; McIntyre, Paul F; Flowerdew, Gordon.  
 Title Preferred and Actual Location of Death: What Factors Enable a Preferred Home Death?.  
 Source Journal of Palliative Medicine. 18(12):1054-9, 2015 Dec.  
 Publication Type Journal Article. Research Support, Non-U.S. Gov't.

**Result 79.**

Unique Identifier 26249645  
 Authors Pesut B; McLean T; Reimer-Kirkham S; Hartrick-Doane G; Hutchings D; Russell LB.  
 Authors Full Name Pesut, Barbara; McLean, Tammy; Reimer-Kirkham, Sheryl; Hartrick-Doane, Gweneth; Hutchings, Deanna; Russell, Lara B.  
 Title Educating registered nursing and healthcare assistant students in community-based supportive care of older adults: A mixed methods study.  
 Source Nurse Education Today. 35(9):e90-6, 2015 Sep.  
 Publication Type Journal Article. Research Support, Non-U.S. Gov't.

**Result 80.**

Unique Identifier 26209094  
 Authors Stiel S; Heckel M; Seifert A; Frauendorf T; Hanke RM; Ostgathe C.  
 Authors Full Name Stiel, Stephanie; Heckel, Maria; Seifert, Andreas; Frauendorf, Tobias; Hanke, Roland Martin; Ostgathe, Christoph.  
 Title Comparison of terminally ill cancer- vs. non-cancer patients in specialized palliative home care in Germany - a single service analysis.  
 Source BMC Palliative Care. 14:34, 2015 Jul 25.  
 Publication Type Journal Article.

**Result 81.**

Unique Identifier 26084951  
 Authors Cloyes KG; Berry PH; Martz K; Supiano K.  
 Authors Full Name Cloyes, Kristin G; Berry, Patricia H; Martz, Kim; Supiano, Katherine.  
 Title Characteristics of Prison Hospice Patients: Medical History, Hospice Care, and End-of-Life Symptom Prevalence.  
 Source Journal of Correctional Health Care. 21(3):298-308, 2015 Jul.  
 Publication Type Journal Article. Research Support, Non-U.S. Gov't.

**Result 82.**

Unique Identifier 26066323  
 Authors Eneanya ND; Goff SL; Martinez T; Gutierrez N; Klingensmith J; Griffith JL; Garvey C; Kitsen J; Germain MJ; Marr L; Berzoff J; Unruh M; Cohen LM.  
 Authors Full Name Eneanya, Nwamaka D; Goff, Sarah L; Martinez, Talaya; Gutierrez, Natalie; Klingensmith, Jamie; Griffith, John L; Garvey, Casey; Kitsen, Jenny; Germain, Michael J; Marr, Lisa; Berzoff, Joan; Unruh, Mark; Cohen, Lewis M.  
 Title Shared decision-making in end-stage renal disease: a protocol for a multi-center study of a communication intervention to improve end-of-life care for dialysis patients.

Source BMC Palliative Care. 14:30, 2015 Jun 12.  
 Publication Type Clinical Trial. Journal Article. Multicenter Study. Research Support, Non-U.S. Gov't.

**Result 83.**

Unique Identifier 26047831  
 Authors Nur U; Quaresma M; De Stavola B; Peake M; Rachet B.  
 Authors Full Name Nur, Ula; Quaresma, Manuela; De Stavola, Bianca; Peake, Michael; Rachet, Bernard.  
 Title Inequalities in non-small cell lung cancer treatment and mortality.  
 Source Journal of Epidemiology & Community Health. 69(10):985-92, 2015 Oct.  
 Publication Type Journal Article. Research Support, Non-U.S. Gov't.

**Result 84.**

Unique Identifier 26028347  
 Authors Buckingham S; Kendall M; Ferguson S; MacNee W; Sheikh A; White P; Worth A; Boyd K; Murray SA; Pinnock H.  
 Authors Full Name Buckingham, Susan; Kendall, Marilyn; Ferguson, Susie; MacNee, William; Sheikh, Aziz; White, Patrick; Worth, Allison; Boyd, Kirsty; Murray, Scott A; Pinnock, Hilary.  
 Title HELPing older people with very severe chronic obstructive pulmonary disease (HELP-COPD): mixed-method feasibility pilot randomised controlled trial of a novel intervention.  
 Source NPJ Primary Care Respiratory Medicine. 25:15020, 2015 Apr 16.  
 Publication Type Journal Article. Randomized Controlled Trial. Research Support, Non-U.S. Gov't.

**Result 85.**

Unique Identifier 25939666  
 Authors Pesut B; Hooper BP; Robinson CA; Bottorff JL; Sawatzky R; Dalhuisen M.  
 Authors Full Name Pesut, B; Hooper, B P; Robinson, C A; Bottorff, J L; Sawatzky, R; Dalhuisen, M.  
 Title Feasibility of a rural palliative supportive service.  
 Source Rural & Remote Health. 15(2):3116, 2015 Apr-Jun.  
 Publication Type Journal Article. Multicenter Study. Research Support, Non-U.S. Gov't.

**Result 86.**

Unique Identifier 25828558  
 Authors Kendall M; Carduff E; Lloyd A; Kimbell B; Cavers D; Buckingham S; Boyd K; Grant L; Worth A; Pinnock H; Sheikh A; Murray SA.  
 Authors Full Name Kendall, Marilyn; Carduff, Emma; Lloyd, Anna; Kimbell, Barbara; Cavers, Debbie; Buckingham, Susan; Boyd, Kirsty; Grant, Liz; Worth, Allison; Pinnock, Hilary; Sheikh, Aziz; Murray, Scott A.  
 Title Different Experiences and Goals in Different Advanced Diseases: Comparing Serial Interviews With Patients With Cancer, Organ Failure, or Frailty and Their Family and Professional Carers.  
 Source Journal of Pain & Symptom Management. 50(2):216-24, 2015 Aug.  
 Publication Type Comparative Study. Journal Article. Research Support, Non-U.S. Gov't.

**Result 87.**

Unique Identifier 25680737  
 Authors Goff SL; Eneanya ND; Feinberg R; Germain MJ; Marr L; Berzoff J; Cohen LM; Unruh M.  
 Authors Full Name Goff, Sarah L; Eneanya, Nwamaka D; Feinberg, Rebecca; Germain, Michael J; Marr, Lisa; Berzoff, Joan; Cohen, Lewis M; Unruh, Mark.  
 Title Advance care planning: a qualitative study of dialysis patients and families.  
 Source Clinical Journal of The American Society of Nephrology: CJASN. 10(3):390-400, 2015 Mar 06.  
 Publication Type Journal Article. Research Support, N.I.H., Extramural. Research Support, Non-U.S. Gov't.

**Result 88.**

Unique Identifier 25637404  
 Authors Silva C; Ramalho C; Luz I; Monteiro J; Fresco P.  
 Authors Full Name Silva, Cristina; Ramalho, Celia; Luz, Isabel; Monteiro, Joaquim; Fresco, Paula.  
 Title Drug-related problems in institutionalized, polymedicated elderly patients: opportunities for pharmacist intervention.

Source International Journal of Clinical Pharmacy. 37(2):327-34, 2015 Apr.  
 Publication Type Journal Article. Observational Study. Research Support, Non-U.S. Gov't.

---

**Result 89.**

Unique Identifier 25561640  
 Authors Leff B; Carlson CM; Saliba D; Ritchie C.  
 Authors Full Name Leff, Bruce; Carlson, Charlotte M; Saliba, Debra; Ritchie, Christine.  
 Title The invisible homebound: setting quality-of-care standards for home-based primary and palliative care.  
 Source Health Affairs. 34(1):21-9, 2015 Jan.  
 Publication Type Journal Article. Research Support, Non-U.S. Gov't.

---

**Result 90.**

Unique Identifier 25554484  
 Authors Kim MT; Kim KB; Han HR; Huh B; Nguyen T; Lee HB.  
 Authors Full Name Kim, Miyong T; Kim, Kim B; Han, Hae-Ra; Huh, Boyun; Nguyen, Tam; Lee, Hochang B.  
 Title Prevalence and Predictors of Depression in Korean American Elderly: Findings from the Memory and Aging Study of Koreans (MASK).  
 Source American Journal of Geriatric Psychiatry. 23(7):671-83, 2015 Jul.  
 Publication Type Journal Article. Research Support, N.I.H., Extramural. Research Support, Non-U.S. Gov't.

---

**Result 91.**

Unique Identifier 25547480  
 Authors Washington KT; Pike KC; Demiris G; Oliver DP.  
 Authors Full Name Washington, Karla T; Pike, Kenneth C; Demiris, George; Oliver, Debra Parker.  
 Title Unique characteristics of informal hospice cancer caregiving.  
 Source Supportive Care in Cancer. 23(7):2121-8, 2015 Jul.  
 Publication Type Journal Article. Randomized Controlled Trial. Research Support, N.I.H., Extramural.

---

**Result 92.**

Unique Identifier 25544001  
 Authors Reyniers T; Deliens L; Pasman HR; Morin L; Addington-Hall J; Frova L; Cardenas-Turanzas M; Onwuteaka-Philipsen B; Naylor W; Ruiz-Ramos M; Wilson DM; Loucka M; Csikos A; Rhee YJ; Teno J; Cohen J; Houttekier D.  
 Authors Full Name Reyniers, Thijs; Deliens, Luc; Pasman, H Roeline; Morin, Lucas; Addington-Hall, Julia; Frova, Luisa; Cardenas-Turanzas, Marylou; Onwuteaka-Philipsen, Bregje; Naylor, Wayne; Ruiz-Ramos, Miguel; Wilson, Donna M; Loucka, Martin; Csikos, Agnes; Rhee, Yong Joo; Teno, Joan; Cohen, Joachim; Houttekier, Dirk.  
 Title International variation in place of death of older people who died from dementia in 14 European and non-European countries.  
 Source Journal of the American Medical Directors Association. 16(2):165-71, 2015 Feb.  
 Publication Type Comparative Study. Journal Article. Research Support, Non-U.S. Gov't.

---

**Result 93.**

Unique Identifier 25205231  
 Authors Zimmerman S; Cohen L; van der Steen JT; Reed D; van Soest-Poortvliet MC; Hanson LC; Sloane PD.  
 Authors Full Name Zimmerman, Sheryl; Cohen, Lauren; van der Steen, Jenny T; Reed, David; van Soest-Poortvliet, Mirjam C; Hanson, Laura C; Sloane, Philip D.  
 Title Measuring end-of-life care and outcomes in residential care/assisted living and nursing homes.  
 Source Journal of Pain & Symptom Management. 49(4):666-79, 2015 Apr.  
 Publication Type Journal Article. Multicenter Study. Randomized Controlled Trial. Research Support, Non-U.S. Gov't.

---

**Result 94.**

Unique Identifier 24863394  
 Authors Bing-Jonsson PC; Bjork IT; Hofoss D; Kirkevold M; Foss C.

Authors Full Name Bing-Jonsson, Pia Cecilie; Bjork, Ida Torunn; Hofoss, Dag; Kirkevold, Marit; Foss, Christina.  
 Title Competence in advanced older people nursing: development of 'nursing older people--competence evaluation tool'.  
 Source International Journal of Older People Nursing. 10(1):59-72, 2015 Mar.  
 Publication Type Journal Article.

---

**Result 95.**

Unique Identifier 24644201  
 Authors Girgis A; Abernethy AP; Currow DC.  
 Authors Full Name Girgis, Afaf; Abernethy, Amy P; Currow, David C.  
 Title Caring at the end of life: do cancer caregivers differ from other caregivers?.  
 Source BMJ supportive & palliative care. 5(5):513-7, 2015 Dec.  
 Publication Type Journal Article. Research Support, Non-U.S. Gov't.

---

**Result 96.**

Unique Identifier 25927972  
 Authors Calanzani N; Moens K; Cohen J; Higginson IJ; Harding R; Deliens L; Toscani F; Ferreira PL; Bausewein C; Daveson BA; Gysels M; Ceulemans L; Gomes B; Project PRISMA.  
 Authors Full Name Calanzani, Natalia; Moens, Katrien; Cohen, Joachim; Higginson, Irene J; Harding, Richard; Deliens, Luc; Toscani, Franco; Ferreira, Pedro L; Bausewein, Claudia; Daveson, Barbara A; Gysels, Marjolein; Ceulemans, Lucas; Gomes, Barbara; Project PRISMA.  
 Title Choosing care homes as the least preferred place to die: a cross-national survey of public preferences in seven European countries.  
 Source BMC Palliative Care. 13:48, 2014 Oct 23.  
 Publication Type Journal Article. Research Support, Non-U.S. Gov't.

---

**Result 97.**

Unique Identifier 25473275  
 Authors Ellis G; Marshall T; Ritchie C.  
 Authors Full Name Ellis, Graham; Marshall, Trudi; Ritchie, Claire.  
 Title Comprehensive geriatric assessment in the emergency department. [Review]  
 Source Clinical Interventions In Aging. 9:2033-43, 2014.  
 Publication Type Journal Article. Review.

---

**Result 98.**

Unique Identifier 25376084  
 Authors Tschirhart EC; Du Q; Kelley AS.  
 Authors Full Name Tschirhart, Evan C; Du, Qingling; Kelley, Amy S.  
 Title Factors influencing the use of intensive procedures at the end of life.  
 Source Journal of the American Geriatrics Society. 62(11):2088-94, 2014 Nov.  
 Publication Type Journal Article. Research Support, N.I.H., Extramural. Research Support, Non-U.S. Gov't.

---

**Result 99.**

Unique Identifier 25375799  
 Authors Kerr CW; Donohue KA; Tangeman JC; Serehali AM; Knodel SM; Grant PC; Luczkiewicz DL; Mylotte K; Marien MJ.  
 Authors Full Name Kerr, Christopher W; Donohue, Kathleen A; Tangeman, John C; Serehali, Amin M; Knodel, Sarah M; Grant, Pei C; Luczkiewicz, Debra L; Mylotte, Kathleen; Marien, Melanie J.  
 Title Cost savings and enhanced hospice enrollment with a home-based palliative care program implemented as a hospice-private payer partnership.  
 Source Journal of Palliative Medicine. 17(12):1328-35, 2014 Dec.  
 Publication Type Comparative Study. Journal Article. Observational Study.

---

**Result 100.**

|                   |                                                                                                                                                                                                                               |
|-------------------|-------------------------------------------------------------------------------------------------------------------------------------------------------------------------------------------------------------------------------|
| Unique Identifier | 25313997                                                                                                                                                                                                                      |
| Authors           | Herce ME; Elmore SN; Kalanga N; Keck JW; Wroe EB; Phiri A; Mayfield A; Chingoli F; Beste JA; Tengatenga L; Bazile J; Krakauer EL; Rigodon J.                                                                                  |
| Authors Full Name | Herce, Michael E; Elmore, Shekinah N; Kalanga, Noel; Keck, James W; Wroe, Emily B; Phiri, Atupere; Mayfield, Alishya; Chingoli, Felix; Beste, Jason A; Tengatenga, Listern; Bazile, Junior; Krakauer, Eric L; Rigodon, Jonas. |
| Title             | Assessing and responding to palliative care needs in rural sub-Saharan Africa: results from a model intervention and situation analysis in Malawi.                                                                            |
| Source            | PLoS ONE [Electronic Resource]. 9(10):e110457, 2014.                                                                                                                                                                          |
| Publication Type  | Journal Article. Research Support, N.I.H., Extramural. Research Support, Non-U.S. Gov't.                                                                                                                                      |

---
