# Supplementary material for: Addressing inequity in palliative care provision for older people living with multimorbidity. Perspectives of community-dwelling older people on their palliative care needs: A scoping review
Source: PubMed Central journal article supplement (PMC10074761; doi:10.1177/02692163221118230), 2022-08-24
Supplement: sj-pdf-3-pmj-10.1177_02692163221118230.pdf [file sj-pdf-3-pmj-10.1177_02692163221118230.pdf]

**Appendix 3: Mixed Methods Appraisal Tool Reporting for Included Papers**

| Reference                 | RQ (research question) |            | Qualitative |     |     |     |     | Quantitative RCT |     |     |     |     | Quantitative Non-RCT |     |     |     |     | Quantitative Descriptive |     |     |     |     | Mixed Methods |     |     |     |     |  |
|---------------------------|------------------------|------------|-------------|-----|-----|-----|-----|------------------|-----|-----|-----|-----|----------------------|-----|-----|-----|-----|--------------------------|-----|-----|-----|-----|---------------|-----|-----|-----|-----|--|
|                           | Clear RQ               | Objectives | 1.1         | 1.2 | 1.3 | 1.4 | 1.5 | 2.1              | 2.2 | 2.3 | 2.4 | 2.5 | 3.1                  | 3.2 | 3.3 | 3.4 | 3.5 | 4.1                      | 4.2 | 4.3 | 4.4 | 4.5 | 5.1           | 5.2 | 5.3 | 5.4 | 5.5 |  |
| Amblas-Novellas (2016)    | Y                      | Y          |             |     |     |     |     |                  |     |     |     |     | U                    | Y   | N   | Y   | Y   |                          |     |     |     |     |               |     |     |     |     |  |
| Beach (2018)              | Y                      | Y          |             |     |     |     |     |                  |     |     |     |     |                      |     |     |     |     | Y                        | Y   | Y   | N   | Y   |               |     |     |     |     |  |
| Bone (2019)               | Y                      | Y          |             |     |     |     |     |                  |     |     |     |     |                      |     |     |     |     | U                        | Y   | Y   | Y   | Y   |               |     |     |     |     |  |
| Brandt (2005)             | Y                      | Y          |             |     |     |     |     |                  |     |     |     |     | Y                    | Y   | U   | U   | Y   |                          |     |     |     |     |               |     |     |     |     |  |
| Chan (2007)               | Y                      | Y          |             |     |     |     |     |                  |     |     |     |     | Y                    | Y   | Y   | N   | Y   |                          |     |     |     |     |               |     |     |     |     |  |
| Chochinov (2016)          | Y                      | Y          |             |     |     |     |     |                  |     |     |     |     |                      |     |     |     |     | Y                        | Y   | Y   | Y   | Y   |               |     |     |     |     |  |
| Gomez-Batiste (2014)      | Y                      | Y          |             |     |     |     |     |                  |     |     |     |     | Y                    | Y   | U   | Y   | Y   |                          |     |     |     |     |               |     |     |     |     |  |
| Goodridge (2005)          | Y                      | Y          | Y           | Y   | Y   | Y   | Y   |                  |     |     |     |     |                      |     |     |     |     |                          |     |     |     |     |               |     |     |     |     |  |
| Kayser-Jones (2002)       | Y                      | Y          | Y           | Y   | U   | Y   | Y   |                  |     |     |     |     |                      |     |     |     |     |                          |     |     |     |     |               |     |     |     |     |  |
| Kayser-Jones et al (2003) | Y                      | Y          | Y           | Y   | Y   | Y   | Y   |                  |     |     |     |     |                      |     |     |     |     |                          |     |     |     |     |               |     |     |     |     |  |
| Kendall (2015)            | Y                      | Y          | Y           | Y   | Y   | Y   | Y   |                  |     |     |     |     |                      |     |     |     |     |                          |     |     |     |     |               |     |     |     |     |  |
| Koslov (2018)             | Y                      | Y          |             |     |     |     |     |                  |     |     |     |     | Y                    | Y   | Y   | Y   | U   |                          |     |     |     |     |               |     |     |     |     |  |
| Kramer (2013)             | Y                      | Y          | Y           | Y   | Y   | Y   | Y   |                  |     |     |     |     |                      |     |     |     |     |                          |     |     |     |     |               |     |     |     |     |  |
| Kricke (2011)             | Y                      | Y          |             |     |     |     |     |                  |     |     |     |     | Y                    | Y   | Y   | Y   | Y   |                          |     |     |     |     |               |     |     |     |     |  |
| Lambotte (2018)           | Y                      | Y          |             |     |     |     |     |                  |     |     |     |     | Y                    | Y   | Y   | Y   | Y   |                          |     |     |     |     |               |     |     |     |     |  |
| Lee (2019)                | Y                      | Y          |             |     |     |     |     |                  |     |     |     |     |                      |     |     |     |     | Y                        | Y   | Y   | Y   | Y   |               |     |     |     |     |  |
| Marcucci (2016)           | Y                      | Y          |             |     |     |     |     |                  |     |     |     |     | Y                    | Y   | Y   | Y   | Y   |                          |     |     |     |     |               |     |     |     |     |  |
| Mason (2016)              | Y                      | Y          |             |     |     |     |     |                  |     |     |     |     | Y                    | Y   | U   | Y   | Y   |                          |     |     |     |     |               |     |     |     |     |  |
| McVey (2013)              | Y                      | Y          | Y           | Y   | Y   | Y   | Y   |                  |     |     |     |     |                      |     |     |     |     |                          |     |     |     |     |               |     |     |     |     |  |
| Nicholson (2018)          | Y                      | Y          |             |     |     |     |     |                  |     |     |     |     | Y                    | Y   | N   | Y   | Y   |                          |     |     |     |     |               |     |     |     |     |  |
| Osterlind (2016)          | Y                      | Y          | Y           | Y   | Y   | Y   | Y   |                  |     |     |     |     |                      |     |     |     |     |                          |     |     |     |     |               |     |     |     |     |  |
| Parker (2005)             | Y                      | Y          |             |     |     |     |     |                  |     |     |     |     |                      |     |     |     |     |                          |     |     |     |     | Y             | Y   | Y   | U   | U   |  |
| Reinke (2019)             | Y                      | Y          |             |     |     |     |     |                  |     |     |     |     | Y                    | Y   | Y   | Y   | Y   |                          |     |     |     |     |               |     |     |     |     |  |
| Sloane (2013)             | Y                      | Y          |             |     |     |     |     |                  |     |     |     |     |                      |     |     |     |     | Y                        | Y   | Y   | Y   | Y   |               |     |     |     |     |  |
| Strohbuecker              | Y                      | Y          | Y           | Y   | Y   | Y   | Y   |                  |     |     |     |     |                      |     |     |     |     |                          |     |     |     |     |               |     |     |     |     |  |
| Van den Brink (2018)      | Y                      | Y          |             |     |     |     |     |                  |     |     |     |     | Y                    | Y   | Y   | Y   | Y   |                          |     |     |     |     |               |     |     |     |     |  |
| Vandenburg (2005)         | Y                      | Y          |             |     |     |     |     |                  |     |     |     |     |                      |     |     |     |     | Y                        | Y   | Y   | U   | Y   |               |     |     |     |     |  |
| Vohra (2006)              | Y                      | Y          |             |     |     |     |     |                  |     |     |     |     |                      |     |     |     |     | Y                        | U   | U   | U   | U   |               |     |     |     |     |  |

**MMAT Key**

Y: Yes;

N: No;

U: Unclear

**Reporting Notes**

- Scoring is not recommended for the MMAT, this table is indicative of the quality of included studies.
- Studies were appraised if they used a self-defined study design – case study/ cross-sectional and best fit MMAT criteria/ description.
- Studies were appraised according to reported data in the paper and not data reported in earlier/linked publications.
